# Supplementary material
Source: Springer Nature journal article supplement (https://www.springermedizin.de/resource/supplementary/12889_2009_2072_MOESM1_ESM.pdf/9484502)

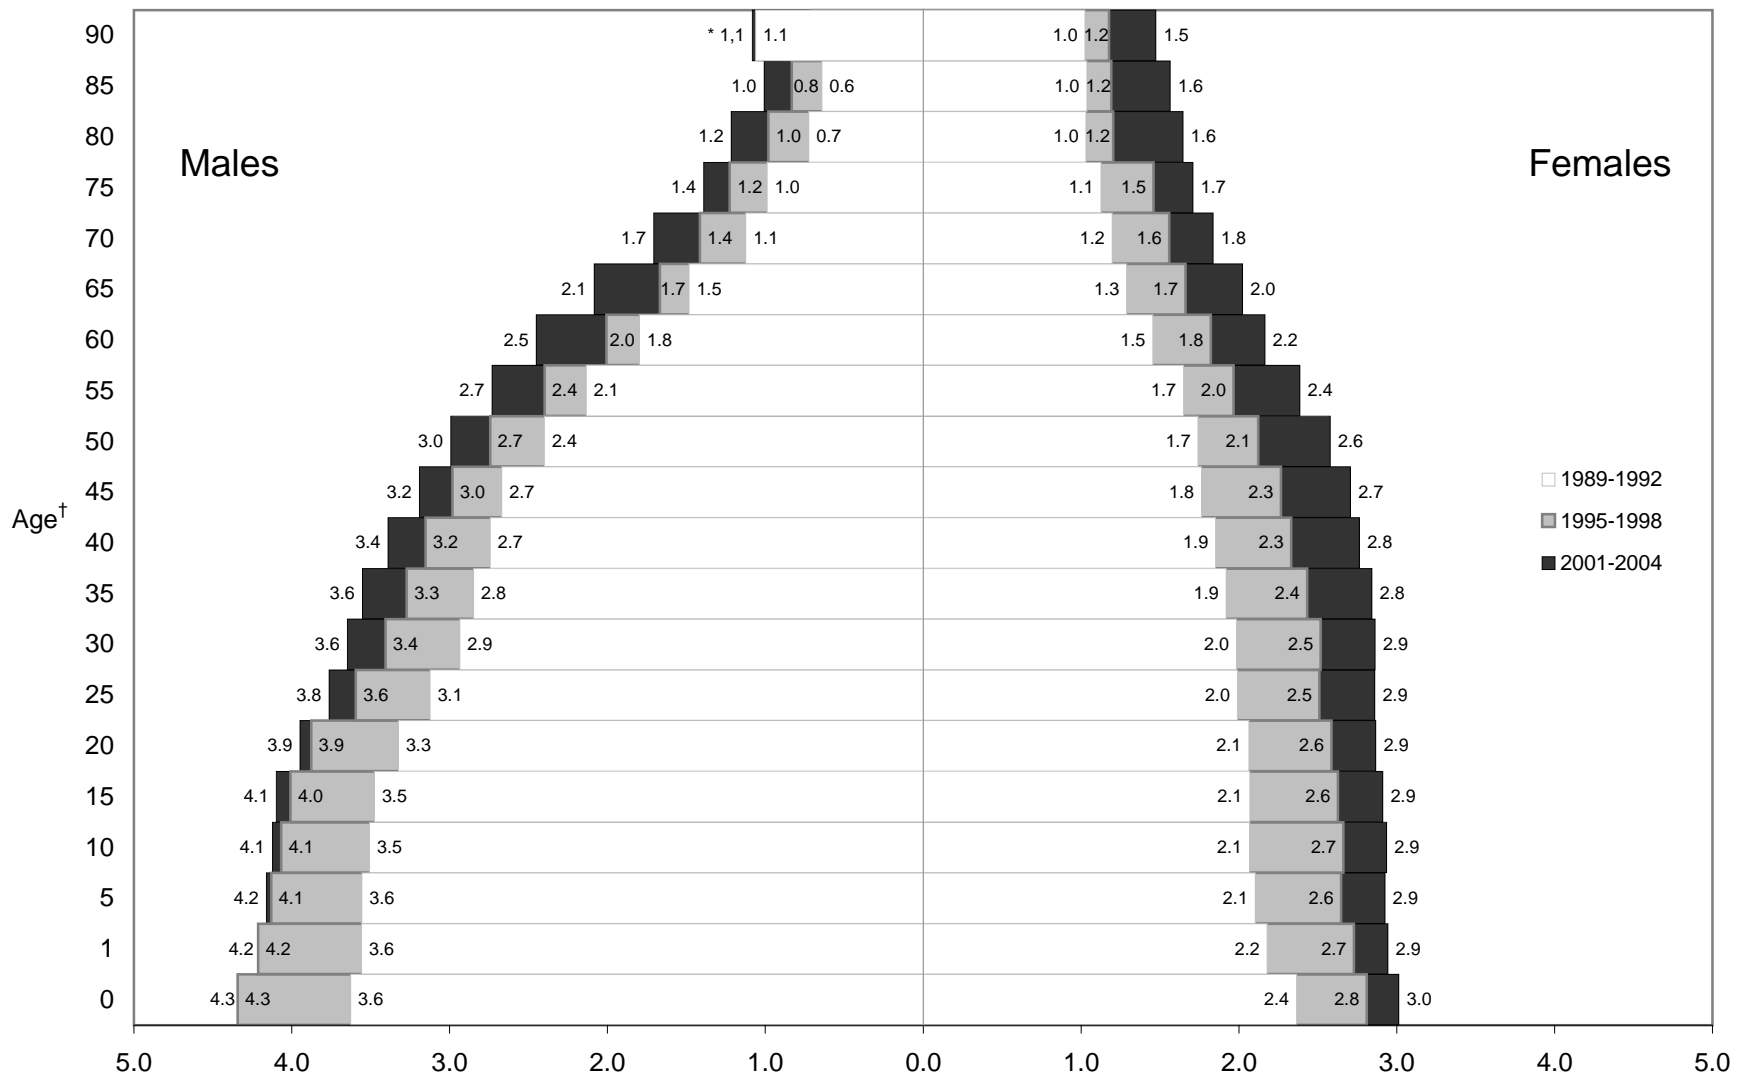

**Difference in life expectancy (in years) between the worst and best-off deciles**

Supplement: MOESM1 [file 9484502]
